# Supplementary material for: Sex‐specific inbreeding depression: A meta‐analysis
Source: PubMed Central journal article supplement (PMC9304238; doi:10.1111/ele.13961), 2022-01-21
Supplement: ELE-25-1009-s001.pdf [file ELE-25-1009-s001.pdf]

# Sex-specific inbreeding depression: A meta-analysis

Regina Vega-Trejo, Raïssa A. de Boer, John L. Fitzpatrick, Alexander Kotrschal

## Section I. Moderators included in the meta-analysis.

### 1a. Descriptions of continuous moderators for meta-regression models.

| Continuous moderator   | Description                                                                                                                                                                                                                                                                                                                                                                                                                                                                                                                                                                                                                                                                                                                                                                                                                                                                                                                                                                                                                                                                                                                                                                                                                                                         |
|------------------------|---------------------------------------------------------------------------------------------------------------------------------------------------------------------------------------------------------------------------------------------------------------------------------------------------------------------------------------------------------------------------------------------------------------------------------------------------------------------------------------------------------------------------------------------------------------------------------------------------------------------------------------------------------------------------------------------------------------------------------------------------------------------------------------------------------------------------------------------------------------------------------------------------------------------------------------------------------------------------------------------------------------------------------------------------------------------------------------------------------------------------------------------------------------------------------------------------------------------------------------------------------------------|
| Sexual size dimorphism | <p>Males are generally expected to be under stronger sexual selection due to sex-specific differences in gametic investment (i.e., anisogamy, Parker <i>et al.</i> 1972) and because males typically experience greater variance in reproductive success than females (Wade 1979; Janicke <i>et al.</i> 2016). Deleterious alleles exposed to inbreeding may make males more sensitive to inbreeding depression either through purging or directional dominance being stronger on males (Wolak &amp; Keller 2014; Grieshop <i>et al.</i> 2021).</p> <p>Body size is considered a sexually selected trait as it may confer an advantage during episodes of sexual selection (pre, postcopulatory) and can be used as a proxy for sexual selection (Janicke &amp; Fromonteil 2021).</p> <p>Sexual size dimorphism for the species included in the study was calculated following Janicke and Fromonteil (2021). To do so, body size (body length, body mass, thorax length, wing length, elytra length, pronotum length) was used to calculate sexual size dimorphism:</p> $SSD = \ln \left( \frac{\text{male size}}{\text{female size}} \right)$ <p>where positive or negative values indicate species with males or females being the larger sex, respectively.</p> |
| Inbreeding coefficient | <p>Coefficient of inbreeding (probability of two alleles at a random chosen locus being identical by descent). Comparison of outbred <math>F = 0</math> vs inbred individuals <math>F = 0.125 - 0.785</math>.</p> <p>The costs of inbreeding depression are predicted to be higher when the coefficients of inbreeding are highest (Charlesworth &amp; Willis 2009), and so individuals with a higher inbreeding coefficient were expected to show stronger inbreeding depression.</p>                                                                                                                                                                                                                                                                                                                                                                                                                                                                                                                                                                                                                                                                                                                                                                              |
| Publication Year       | Year of publication, as extracted from Web of Science or Scopus.                                                                                                                                                                                                                                                                                                                                                                                                                                                                                                                                                                                                                                                                                                                                                                                                                                                                                                                                                                                                                                                                                                                                                                                                    |

## Ib. Description of categorical moderators for meta-regression models.

| Categorical moderator | Category                     | Description                                                                                                                                                                                                                                                                                                                                                                                                                                                                                                                                                                                           |
|-----------------------|------------------------------|-------------------------------------------------------------------------------------------------------------------------------------------------------------------------------------------------------------------------------------------------------------------------------------------------------------------------------------------------------------------------------------------------------------------------------------------------------------------------------------------------------------------------------------------------------------------------------------------------------|
| Sex                   |                              | Males and females can be differently affected by inbreeding depression. Different processes may lead to non-mutually exclusive outcomes (sexual selection, heterogamety, dominance, sexual conflict) as to which sex may be more sensitive to inbreeding depression.                                                                                                                                                                                                                                                                                                                                  |
|                       | Male                         | Trait measured in male individuals.                                                                                                                                                                                                                                                                                                                                                                                                                                                                                                                                                                   |
|                       | Female                       | Trait measured in female individuals.                                                                                                                                                                                                                                                                                                                                                                                                                                                                                                                                                                 |
| Heterogamety          |                              | Sex chromosomes are heteromorphic in many species, leading to one sex carrying a heterogamous set of sex chromosomes (e.g. XY males in XY systems and ZW females in ZW systems) and the other a homozygous set (e.g. XX females in XY systems and ZZ males in ZW systems). Genes on the heterozygous sex chromosomes (e.g. XY males) cannot contribute to inbreeding depression, because deleterious recessive alleles on the sex chromosome cannot be masked by a second dominant allele and are thus expressed regardless of the degree of inbreeding (Agrawal 2011; Sultanova <i>et al.</i> 2018). |
|                       | Homogametic<br>Heterogametic | Sex where sex chromosomes are the same (e.g. XX, ZZ).<br>Sex where sex chromosomes are not the same (e.g. XY, ZW).                                                                                                                                                                                                                                                                                                                                                                                                                                                                                    |
| Stress                |                              | Inbreeding depression is expected to be exacerbated under stressful conditions (Armbruster & Reed 2005; Fox & Reed 2011). Stronger sexual selection on males is often associated with density dependence, which reflects more intense intraspecific competition (i.e., a stressful environment, Yun & Agrawal 2014). Yet, selection in males and females can align under stressful conditions (Martinossi-Allibert <i>et al.</i> 2017).                                                                                                                                                               |
|                       |                              | Note that stressful conditions were determined as stressful based the description provided by the authors of the papers included in our data, and in most cases, there was a comparison between outbred and inbred individuals that were in stressful vs non stressful environments.                                                                                                                                                                                                                                                                                                                  |
|                       | No<br>Yes                    | Traits were measured under non-stressful environments<br>Traits were measured under stressful environments (temperature stress, chemical stress, competition, food stress, environmental complexity).                                                                                                                                                                                                                                                                                                                                                                                                 |
| Traits                |                              | The effects of inbreeding depression on different types of traits will differ due to the genetic architecture of the traits (Bolund <i>et al.</i> 2010). For instance, life history traits and sexually selected traits are expected to suffer higher levels of inbreeding depression than morphological traits (Crnokrak & Roff 1999; Cotton <i>et al.</i> 2004). The interplay between directional selection and sex-specific inbreeding depression is not known, and therefore fitness related traits were examined.                                                                               |
|                       | Body size                    | Effect size measured in body size or body weight.                                                                                                                                                                                                                                                                                                                                                                                                                                                                                                                                                     |
|                       | Mating                       | Effect size measured in number of copulations, mating duration, mating latency.                                                                                                                                                                                                                                                                                                                                                                                                                                                                                                                       |
|                       | Reproduction                 | Effect size measured in number of offspring, paternity success, fecundity, egg viability.                                                                                                                                                                                                                                                                                                                                                                                                                                                                                                             |
|                       | Survival                     | Effect size measured in lifespan or longevity.                                                                                                                                                                                                                                                                                                                                                                                                                                                                                                                                                        |

|                                                                                                                                 |                                                                                                                                                                                                                                                                                                                                                                                                                                                                                                                                            |
|---------------------------------------------------------------------------------------------------------------------------------|--------------------------------------------------------------------------------------------------------------------------------------------------------------------------------------------------------------------------------------------------------------------------------------------------------------------------------------------------------------------------------------------------------------------------------------------------------------------------------------------------------------------------------------------|
| <p>Class</p> <p>Actinopterygii<br/>Arachnida<br/>Aves<br/>Gastropoda<br/>Insecta<br/>Mammalia<br/>Secernentea<br/>Teleostei</p> | <p>Taxonomic class species belong to. Much information on inbreeding depression come from model species, and is essential to know how general are patterns across taxonomic groups.</p>                                                                                                                                                                                                                                                                                                                                                    |
| <p>Fertilisation mode</p> <p>Internal<br/>External</p>                                                                          | <p>Differences in the site of fertilisation may predict the extent of inbreeding depression and in turn affect the evolution of mating systems (Cohen 1996). External fertilisers share key life history traits with seed plants (low mobility, release of gametes into the environment) (Olsen <i>et al.</i> 2020), which may lead to external fertilisers being more sensitive to inbreeding depression.</p> <p>Trait measured in species with internal fertilisation.</p> <p>Trait measured in species with external fertilisation.</p> |
| <p>Reproductive mode</p> <p>Egg-laying<br/>Live-bearing</p>                                                                     | <p>The mode of reproduction can affect how sensitive species are to inbreeding depression as allocation and investment of resources may differ. Whether males or females could be differentially affected by this inherent biological difference has not been addressed.</p> <p>Trait measured in species that lay eggs.</p> <p>Trait measured in species that give birth to live young.</p>                                                                                                                                               |

## References

- Agrawal, A.F. (2011). Are males the more 'sensitive' sex? *Heredity (Edinb)*, 107, 20-21.
- Armbruster, P. & Reed, D.H. (2005). Inbreeding depression in benign and stressful environments. *Heredity (Edinb)*, 95, 235-242.
- Bolund, E., Martin, K., Kempnaers, B. & Forstmeier, W. (2010). Inbreeding depression of sexually selected traits and attractiveness in the zebra finch. *Animal Behaviour*, 79, 947-955.
- Charlesworth, D. & Willis, J.H. (2009). The genetics of inbreeding depression. *Nature Reviews: Genetics*, 10, 783-796.
- Cohen, C.S. (1996). THE EFFECTS OF CONTRASTING MODES OF FERTILIZATION ON LEVELS OF INBREEDING IN THE MARINE INVERTEBRATE GENUS CORELLA. *Evolution*, 50, 1896-1907.
- Cotton, S., Fowler, K. & Pomiankowski, A. (2004). Do sexual ornaments demonstrate heightened condition-dependent expression as predicted by the handicap hypothesis? *Proceedings of the Royal Society B-Biological Sciences*, 271, 771-783.
- Crnokrak, P. & Roff, D.A. (1999). Inbreeding depression in the wild. *Heredity*, 83, 260-270.
- Fox, C.W. & Reed, D.H. (2011). Inbreeding depression increases with environmental stress: an experimental study and meta-analysis. *Evolution*, 65, 246-258.
- Grieshop, K., Maurizio, P.L., Arnqvist, G. & Berger, D. (2021). Selection in males purges the mutation load on female fitness. *Evolution Letters*, 5, 328-343.
- Janicke, T. & Fromonteil, S. (2021). Sexual selection and sexual size dimorphism in animals. *Biology Letters*, 17, 20210251.
- Janicke, T., Häderer, I.K., Lajeunesse, M.J. & Anthes, N. (2016). Darwinian sex roles confirmed across the animal kingdom. *Science Advances*, 2, e1500983.
- Martinossi-Allibert, I., Arnqvist, G. & Berger, D. (2017). Sex-specific selection under environmental stress in seed beetles. *Journal of Evolutionary Biology*, 30, 161-173.
- Olsen, K.C., Ryan, W.H., Winn, A.A., Kosman, E.T., Moscoso, J.A., Krueger-Hadfield, S.A. *et al.* (2020). Inbreeding shapes the evolution of marine invertebrates. *Evolution*, 74, 871-882.
- Parker, G.A., Baker, R.R. & Smith, V.G.F. (1972). The origin and evolution of gamete dimorphism and the male-female phenomenon. *Journal of Theoretical Biology*, 36, 529-553.
- Sultanova, Z., Andic, M. & Carazo, P. (2018). The "unguarded-X" and the genetic architecture of lifespan: Inbreeding results in a potentially maladaptive sex-specific reduction of female lifespan in *Drosophila melanogaster*. *Evolution*, 72, 540-552.
- Wade, M.J. (1979). Sexual Selection and Variance in Reproductive Success. *The American Naturalist*, 114, 742-747.
- Wolak, M.E. & Keller, L.F. (2014). Dominance genetic variance and inbreeding in natural populations. In: *Quantitative Genetics in the Wild* (eds. Charmantier, A, Garant, D & Kruuk, LEB). Oxford University Press, Oxford, pp. 104-128.
- Yun, L. & Agrawal, A.F. (2014). Variation in the strength of inbreeding depression across environments: Effects of stress and density dependence. *Evolution*, 68, 3599-3606.

## Section II. List of species included in the meta-analysis with their corresponding heterogamy.

| Species                           | Female        | Male          | Family        | Order       | Class     | Heterogametic system                                                                          | Source                             |
|-----------------------------------|---------------|---------------|---------------|-------------|-----------|-----------------------------------------------------------------------------------------------|------------------------------------|
| <i>Drosophila serrata</i>         | homogametic   | heterogametic | Drosophilidae | Diptera     | Insecta   | XX, XY                                                                                        | (Navara 2018)                      |
| <i>Drosophila bunnanda</i>        | homogametic   | heterogametic | Drosophilidae | Diptera     | Insecta   | XX, XY                                                                                        | (Navara 2018)                      |
| <i>Drosophila birchii</i>         | homogametic   | heterogametic | Drosophilidae | Diptera     | Insecta   | XX, XY                                                                                        | (Navara 2018)                      |
| <i>Drosophila simulans</i>        | homogametic   | heterogametic | Drosophilidae | Diptera     | Insecta   | XX, XY                                                                                        | (Navara 2018)                      |
| <i>Drosophila melanogaster</i>    | homogametic   | heterogametic | Drosophilidae | Diptera     | Insecta   | XX, XY                                                                                        | (Navara 2018)                      |
| <i>Drosophila bipectinata</i>     | homogametic   | heterogametic | Drosophilidae | Diptera     | Insecta   | XX, XY                                                                                        | (Navara 2018)                      |
| <i>Drosophila pseudoananassae</i> | homogametic   | heterogametic | Drosophilidae | Diptera     | Insecta   | XX, XY                                                                                        | (Navara 2018)                      |
| <i>Drosophila repleta</i>         | homogametic   | heterogametic | Drosophilidae | Diptera     | Insecta   | XX, XY                                                                                        | (Navara 2018)                      |
| <i>Drosophila sulfurigaster</i>   | homogametic   | heterogametic | Drosophilidae | Diptera     | Insecta   | XX, XY                                                                                        | (Navara 2018)                      |
| <i>Teleopsis dalmanni</i>         | homogametic   | heterogametic | Diopsidae     | Diptera     | Insecta   | XX, XY                                                                                        | (Warren <i>et al.</i> 2010)        |
| <i>Aedes geniculatus</i>          | homogametic   | heterogametic | Culicidae     | Diptera     | Insecta   | mm, Mm                                                                                        | (Koskinioti <i>et al.</i> 2021)    |
| <i>Aedes albopictus</i>           | homogametic   | heterogametic | Culicidae     | Diptera     | Insecta   | mm, Mm                                                                                        | (Craig & Hickey 1967)              |
| <i>Heliconius erato</i>           | heterogametic | homogametic   | Nymphalidae   | Lepidoptera | Insecta   | ZW, ZZ                                                                                        | (Van Belleghem <i>et al.</i> 2018) |
| <i>Bicyclus anynana</i>           | heterogametic | homogametic   | Nymphalidae   | Lepidoptera | Insecta   | WZ, ZZ                                                                                        | (Van't Hof <i>et al.</i> 2008)     |
| <i>Pieris napi</i>                | heterogametic | homogametic   | Pieridae      | Lepidoptera | Insecta   | ZW, ZZ                                                                                        | (Keehnen <i>et al.</i> 2018)       |
| <i>Stator limbatus</i>            | homogametic   | heterogametic | Chrysomelidae | Coleoptera  | Insecta   | XX, XO                                                                                        | (Arnqvist <i>et al.</i> 2015)      |
| <i>Callosobruchus maculatus</i>   | homogametic   | heterogametic | Chrysomelidae | Coleoptera  | Insecta   | XX, XO                                                                                        | (Savalli & Fox 1998)               |
| <i>Phaedon cochleariae</i>        | homogametic   | heterogametic | Chrysomelidae | Coleoptera  | Insecta   | XX, XO                                                                                        | (Arnqvist <i>et al.</i> 2015)      |
| <i>Euscepes postfasciatus</i>     | homogametic   | heterogametic | Curculionidae | Coleoptera  | Insecta   | XX, XO                                                                                        | (Suomalainen 1940)                 |
| <i>Ips pini</i>                   | homogametic   | heterogametic | Curculionidae | Coleoptera  | Insecta   | XX, XO                                                                                        | (Sargent & Reid, 1999)             |
| <i>Tenebrio molitor</i>           | homogametic   | heterogametic | Tenebrionidae | Coleoptera  | Insecta   | XX, XO                                                                                        | (Arnqvist <i>et al.</i> 2015)      |
| <i>Tribolium castaneum</i>        | homogametic   | heterogametic | Tenebrionidae | Coleoptera  | Insecta   | XX, XO                                                                                        | (Arnqvist <i>et al.</i> 2015)      |
| <i>Nicrophorus vespilloides</i>   | homogametic   | heterogametic | Silphidae     | Coleoptera  | Insecta   | XX, XO                                                                                        | (Angus & Diaz, 1991)               |
| <i>Narnia femorata</i>            | homogametic   | heterogametic | Coreidae      | Hemiptera   | Insecta   | XX, XO                                                                                        | (Dutt 1959)                        |
| <i>Teleogryllus oceanicus</i>     | homogametic   | heterogametic | Gryllidae     | Orthoptera  | Insecta   | XX, XO                                                                                        | (Moran <i>et al.</i> 2018)         |
| <i>Teleogryllus commodus</i>      | homogametic   | heterogametic | Gryllidae     | Orthoptera  | Insecta   | XX, XO                                                                                        | (Moran <i>et al.</i> 2018)         |
| <i>Gryllobes sigillatus</i>       | homogametic   | heterogametic | Gryllidae     | Orthoptera  | Insecta   | XX, XY                                                                                        | (Rao & Arora 1979)                 |
| <i>Forficula auricularia</i>      | homogametic   | heterogametic | Forficulidae  | Dermaptera  | Insecta   | XX, XY                                                                                        | (Rankin & Palmer 2009)             |
| <i>Stegodyphus lineatus</i>       | homogametic   | heterogametic | Eresidae      | Araneae     | Arachnida | X <sub>1</sub> X <sub>1</sub> X <sub>2</sub> X <sub>2</sub> , X <sub>1</sub> X <sub>2</sub> 0 | (Cordellier <i>et al.</i> 2020)    |

|                                  |               |               |              |                    |                |        |                               |
|----------------------------------|---------------|---------------|--------------|--------------------|----------------|--------|-------------------------------|
| <i>Rhizoglyphus robini</i>       | homogametic   | heterogametic | Acaridae     | Sarcoptiformes     | Arachnida      | XX, XO | (Radwan 1995)                 |
| <i>Caenorhabditis remanei</i>    | homogametic   | heterogametic | Rhabditidae  | Rhabditida         | Secernentea    | XX, XO | (Baird & Seibert 2013)        |
| <i>Physa acuta</i>               | NA            | NA            | Physidae     | Hygrophila         | Gastropoda     |        |                               |
| <i>Poeciliopsis occidentalis</i> | heterogametic | homogametic   | Poeciliidae  | Cyprinodontiformes | Actinopterygii | XY, XX | (Yamamoto & Kajishima 1968)   |
| <i>Gambusia holbrooki</i>        | homogametic   | heterogametic | Poeciliidae  | Cyprinodontiformes | Actinopterygii | XX, XY | (Senior <i>et al.</i> 2013)   |
| <i>Heterandria formosa</i>       | NA            | NA            | Poeciliidae  | Cyprinodontiformes | Actinopterygii |        |                               |
| <i>Poecilia reticulata</i>       | homogametic   | heterogametic | Poeciliidae  | Cyprinodontiformes | Actinopterygii | XX, XY | (Tomohisa <i>et al.</i> 2005) |
| <i>Pelvicachromis taeniatus</i>  | homogametic   | heterogametic | Cichlidae    | Cichliformes       | Actinopterygii | XX, XY | (Pandian 2011)                |
| <i>Oreochromis niloticus</i>     | homogametic   | heterogametic | Cichlidae    | Cichliformes       | Actinopterygii | XX, XY | (Lee <i>et al.</i> 2003)      |
| <i>Danio rerio</i>               | NA            | NA            | Cyprinidae   | Cypriniformes      | Teleostei      |        |                               |
| <i>Microtus oeconomus</i>        | homogametic   | heterogametic | Cricetidae   | Rodentia           | Mammalia       | XX, XY | (Raman & Das 1991)            |
| <i>Microtus ochrogaster</i>      | homogametic   | heterogametic | Cricetidae   | Rodentia           | Mammalia       | XX, XY | (Borodin <i>et al.</i> 2012)  |
| <i>Peromyscus leucopus</i>       | homogametic   | heterogametic | Cricetidae   | Rodentia           | Mammalia       | XX, XY | (Waters <i>et al.</i> 2007)   |
| <i>Peromyscus polionotus</i>     | homogametic   | heterogametic | Cricetidae   | Rodentia           | Mammalia       | XX, XY | (Waters <i>et al.</i> 2007)   |
| <i>Parotomys littledalei</i>     | homogametic   | heterogametic | Muridae      | Rodentia           | Mammalia       | XX, XY | (Waters <i>et al.</i> 2007)   |
| <i>Mus musculus domesticus</i>   | homogametic   | heterogametic | Muridae      | Rodentia           | Mammalia       | XX, XY | (Raman & Das 1991)            |
| <i>Serinus canaria</i>           | heterogametic | homogametic   | Fringillidae | Passeriformes      | Aves           | ZW, ZZ | (Doosti <i>et al.</i> 2009)   |

## References

- Arnqvist, G., Sayadi, A., Immonen, E., Hotzy, C., Rankin, D., Tuda, M. *et al.* (2015). Genome size correlates with reproductive fitness in seed beetles. *Proceedings of the Royal Society B: Biological Sciences*, 282, 20151421.
- Baird, S.E. & Seibert, S.R. (2013). Reproductive isolation in the *Elegans*-Group of *Caenorhabditis*. *Natural Science*, 5, 18.
- Borodin, P.M., Basheva, E.A., Torgasheva, A.A., Dashkevich, O.A., Golenishchev, F.N., Kartavtseva, I.V. *et al.* (2012). Multiple independent evolutionary losses of XY pairing at meiosis in the grey voles. *Chromosome Research*, 20, 259-268.
- Cordellier, M., Schneider, J.M., Uhl, G. & Posnien, N. (2020). Sex differences in spiders: from phenotype to genomics. *Development Genes and Evolution*, 230, 155-172.
- Craig, G.B., Jr. & Hickey, W.A. (1967). Current status of the formal genetics of *Aedes aegypti*. *Bulletin of The World Health Organization*, 36, 559-562.
- Doosti, A., Fathpour, H. & Moshkelani, S. (2009). Sex identification in the Canary using DNA typing methods. *Bulgarian Journal of Veterinary Medicine*, 12.
- Dutt, M. (1959). Cytology of three species of coreid bugs with special reference to multiple sex chromosome mechanism. *Genetica*, 29, 110-119.
- Keehnen, N.L.P., Hill, J., Nylin, S. & Wheat, C.W. (2018). Microevolutionary selection dynamics acting on immune genes of the green-veined white butterfly, *Pieris napi*. *Molecular Ecology*, 27, 2807-2822.
- Koskinioti, P., Augustinos, A.A., Carvalho, D.O., Misbah-ul-Haq, M., Pillwax, G., de la Fuente, L.D. *et al.* (2021). Genetic sexing strains for the population suppression of the mosquito vector *Aedes aegypti*. *Philosophical Transactions of the Royal Society B: Biological Sciences*, 376, 20190808.
- Lee, B.Y., Penman, D.J. & Kocher, T.D. (2003). Identification of a sex-determining region in Nile tilapia (*Oreochromis niloticus*) using bulked segregant analysis. *Animal Genetics*, 34, 379-383.
- Moran, P.A., Pascoal, S., Cezard, T., Risse, J.E., Ritchie, M.G. & Bailey, N.W. (2018). Opposing patterns of intraspecific and interspecific differentiation in sex chromosomes and autosomes. *Molecular Ecology*, 27, 3905-3924.
- Navara, K.J. (2018). The truth about Nemo's dad: Sex-changing behaviors in fishes. In: *Choosing Sexes*. Springer, pp. 183-212.
- Pandian, T. (2011). *Sex determination in fish*. CRC press.
- Radwan, J. (1995). Male morph determination in two species of acarid mites. *Heredity*, 74, 669-673.
- Raman, R. & Das, P. (1991). Mammalian sex chromosomes III. Activity of pseudoautosomal steroid sulfatase enzyme during spermatogenesis in *Mus musculus*. *Somatic Cell and Molecular Genetics*, 17, 429-433.
- Rankin, S.M. & Palmer, J.O. (2009). Chapter 70 - Dermaptera: (Earwigs). In: *Encyclopedia of Insects (Second Edition)* (eds. Resh, V.H. & Cardé, R.T.). Academic Press San Diego, pp. 259-261.
- Rao, S. & Arora, P. (1979). Insect sex chromosomes. *Chromosoma*, 74, 241-252.
- Savalli, U.M. & Fox, C.W. (1998). Genetic variation in paternal investment in a seed beetle. *Animal Behaviour*, 56, 953-961.
- Senior, A.M., Krkosek, M. & Nakagawa, S. (2013). The practicality of Trojan sex chromosomes as a biological control: an agent based model of two highly invasive *Gambusia* species. *Biological Invasions*, 15, 1765-1782.
- Suomalainen, E. (1940). Polyploidy in parthenogenetic Curculionidae. *Hereditas*, 26, 51-64.
- Tomohisa, W., Minoru, Y., Masamichi, N. & Nobuhiko, T. (2005). Linkage Mapping of AFLP and Microsatellite DNA Markers with the Body Color- and Sex-Determining Loci in the Guppy *Poecilia reticulata*. *Zoological Science*, 22, 883-889.
- Van Belleghem, S.M., Baquero, M., Papa, R., Salazar, C., McMillan, W.O., Counterman, B.A. *et al.* (2018). Patterns of Z chromosome divergence among *Heliconius* species highlight the importance of historical demography. *Molecular Ecology*, 27, 3852-3872.
- Van't Hof, A.E., Marec, F., Saccheri, I.J., Brakefield, P.M. & Zwaan, B.J. (2008). Cytogenetic Characterization and AFLP-Based Genetic Linkage Mapping for the Butterfly *Bicyclus anynana*, Covering All 28 Karyotyped Chromosomes. *PLoS One*, 3, e3882.
- Warren, I.A., Fowler, K. & Smith, H. (2010). Germline transformation of the stalk-eyed fly, *Teleopsis dalmanni*. *BMC Molecular Biology*, 11, 86.
- Waters, P.D., Wallis, M.C. & Graves, J.A.M. (2007). Mammalian sex—origin and evolution of the Y chromosome and SRY. In: *Seminars in Cell & Developmental Biology*. Elsevier, pp. 389-400.
- Yamamoto, T.-O. & Kajishima, T. (1968). Sex hormone induction of sex reversal in the goldfish and evidence for male heterogamity. *Journal of Experimental Zoology*, 168, 215-221.

### Section III. List of species included in the meta-analysis with their corresponding sexual size dimorphism.

| Species                           | Family        | Order       | Class     | Size Dimorphism | Trait measured   | Source                            |
|-----------------------------------|---------------|-------------|-----------|-----------------|------------------|-----------------------------------|
| <i>Drosophila serrata</i>         | Drosophilidae | Diptera     | Insecta   | -0.0561         | wing size        | (Liefting <i>et al.</i> 2009)     |
| <i>Drosophila bunnanda</i>        | Drosophilidae | Diptera     | Insecta   |                 |                  |                                   |
| <i>Drosophila birchii</i>         | Drosophilidae | Diptera     | Insecta   | 0.0654          | wing size        | (Kellermann <i>et al.</i> 2007)   |
| <i>Drosophila simulans</i>        | Drosophilidae | Diptera     | Insecta   | -0.1088         | thorax length    | (Pitnick <i>et al.</i> 1995)      |
| <i>Drosophila melanogaster</i>    | Drosophilidae | Diptera     | Insecta   | -0.1178         | thorax length    | (Pitnick <i>et al.</i> 1995)      |
| <i>Drosophila bipectinata</i>     | Drosophilidae | Diptera     | Insecta   | -0.2746         | wing size        | (Imasheva <i>et al.</i> 1999)     |
| <i>Drosophila pseudoananassae</i> | Drosophilidae | Diptera     | Insecta   |                 |                  |                                   |
| <i>Drosophila repleta</i>         | Drosophilidae | Diptera     | Insecta   |                 |                  |                                   |
| <i>Drosophila sulfurigaster</i>   | Drosophilidae | Diptera     | Insecta   | -0.0135         | wing length      | (Neethu & Harini 2014)            |
| <i>Teleopsis dalmanni</i>         | Diopsidae     | Diptera     | Insecta   | 0.0342          | thorax length    | (Prokop <i>et al.</i> 2010)       |
| <i>Aedes geniculatus</i>          | Culicidae     | Diptera     | Insecta   | -0.5251         | body mass        | (Bradshaw & Holzapfel 1992)       |
| <i>Aedes albopictus</i>           | Culicidae     | Diptera     | Insecta   | -0.1867         | wing size        | (Sánchez <i>et al.</i> 2017)      |
| <i>Heliconius erato</i>           | Nymphalidae   | Lepidoptera | Insecta   | -0.0028         | hind wing length | (Klein & de Araújo 2013)          |
| <i>Bicyclus anynana</i>           | Nymphalidae   | Lepidoptera | Insecta   | -0.2343         | pupal mass       | (Dierks <i>et al.</i> 2012)       |
| <i>Pieris napi</i>                | Pieridae      | Lepidoptera | Insecta   | 0.0246          |                  | (Stjernholm & Karlsson 2000)      |
| <i>Stator limbatus</i>            | Chrysomelidae | Coleoptera  | Insecta   | 0.0350          | body mass        | (Stillwell & Fox 2009)            |
| <i>Callosobruchus maculatus</i>   | Chrysomelidae | Coleoptera  | Insecta   | -0.0478         | elytron length   | (Colgoni & Vamosi 2006)           |
| <i>Phaedon cochleariae</i>        | Chrysomelidae | Coleoptera  | Insecta   | -0.4523         | body mass        | (Müller <i>et al.</i> 2016)       |
| <i>Euscepes postfasciatus</i>     | Curculionidae | Coleoptera  | Insecta   | -0.0175         | elytra length    | (Kumano <i>et al.</i> 2010)       |
| <i>Ips pini</i>                   | Curculionidae | Coleoptera  | Insecta   | 0.0118          | body size        | (Foelker & Hofstetter 2014)       |
| <i>Tenebrio molitor</i>           | Tenebrionidae | Coleoptera  | Insecta   | 0.0268          | body mass        | (Rantala <i>et al.</i> 2011)      |
| <i>Tribolium castaneum</i>        | Tenebrionidae | Coleoptera  | Insecta   | -0.0196         | protonum width   | (Conner & Via 1992)               |
| <i>Nicrophorus vespilloides</i>   | Silphidae     | Coleoptera  | Insecta   | -0.0253         | elytra length    | (Otronen 1988)                    |
| <i>Narnia femorata</i>            | Coreidae      | Hemiptera   | Insecta   | -0.0824         | protonum width   | (Allen & Miller 2017)             |
| <i>Teleogryllus oceanicus</i>     | Gryllidae     | Orthoptera  | Insecta   | 0.0507          | protonum width   | (Nystrand <i>et al.</i> 2011)     |
| <i>Teleogryllus commodus</i>      | Gryllidae     | Orthoptera  | Insecta   | 0.0697          | body mass        | (Drayton <i>et al.</i> 2011)      |
| <i>Gryllobes sigillatus</i>       | Gryllidae     | Orthoptera  | Insecta   | -0.0673         | femur length     | (Galicia <i>et al.</i> 2014)      |
| <i>Forficula auricularia</i>      | Forficulidae  | Dermaptera  | Insecta   | 0.2136          | elytra length    | (Radesäter & Halldórsdóttir 1993) |
| <i>Stegodyphus lineatus</i>       | Eresidae      | Araneae     | Arachnida | -0.0866         | body size        | (Schneider 1997)                  |



|                                  |              |                    |                |         |               |                                    |
|----------------------------------|--------------|--------------------|----------------|---------|---------------|------------------------------------|
| <i>Rhizoglyphus robini</i>       | Acaridae     | Sarcoptiformes     | Arachnida      | -0.2016 | body size     | (Deere <i>et al.</i> 2015)         |
| <i>Caenorhabditis remanei</i>    | Rhabditidae  | Rhabditida         | Secernentea    | NA      |               |                                    |
| <i>Physa acuta</i>               | Physidae     | Hygrophila         | Gastropoda     | NA      |               |                                    |
| <i>Poeciliopsis occidentalis</i> | Poeciliidae  | Cyprinodontiformes | Actinopterygii | -0.3331 | body size     | (Constanz 1975)                    |
| <i>Gambusia holbrooki</i>        | Poeciliidae  | Cyprinodontiformes | Actinopterygii | -0.3506 | body size     | (Bisazza & Pilastro 1997)          |
| <i>Heterandria formosa</i>       | Poeciliidae  | Cyprinodontiformes | Actinopterygii | -0.2345 | body size     | (Bisazza & Pilastro 1997)          |
| <i>Poecilia reticulata</i>       | Poeciliidae  | Cyprinodontiformes | Actinopterygii | -0.3523 | body size     | (Bisazza & Pilastro 1997)          |
| <i>Pelvicachromis taeniatus</i>  | Cichlidae    | Cichliformes       | Actinopterygii | 0.3538  | body size     | (Meuthen <i>et al.</i> 2018)       |
| <i>Oreochromis niloticus</i>     | Cichlidae    | Cichliformes       | Actinopterygii | 0.0657  | body size     | (Nguyen <i>et al.</i> 2007)        |
| <i>Danio rerio</i>               | Cyprinidae   | Cypriniformes      | Teleostei      | -0.0843 | body size     | (Uusi-Heikkilä <i>et al.</i> 2012) |
| <i>Microtus oeconomus</i>        | Cricetidae   | Rodentia           | Mammalia       | 0.0180  | body mass     | (Tast 1972)                        |
| <i>Microtus ochrogaster</i>      | Cricetidae   | Rodentia           | Mammalia       | 0.0732  | body mass     | (Dewsbury <i>et al.</i> 1980)      |
| <i>Peromyscus leucopus</i>       | Cricetidae   | Rodentia           | Mammalia       | 0.0723  | body mass     | (Dewsbury <i>et al.</i> 1980)      |
| <i>Peromyscus polionotus</i>     | Cricetidae   | Rodentia           | Mammalia       | -0.0192 | body mass     | (Dewsbury <i>et al.</i> 1980)      |
| <i>Parotomys littledalei</i>     | Muridae      | Rodentia           | Mammalia       | 0.1955  | body mass     | (Pillay 2002)                      |
| <i>Mus musculus domesticus</i>   | Muridae      | Rodentia           | Mammalia       | 0.1405  | body mass     | (Dewsbury <i>et al.</i> 1980)      |
| <i>Serinus canaria</i>           | Fringillidae | Passeriformes      | Aves           | 0.0223  | tarsus length | (de Boer <i>et al.</i> 2016)       |

## References

- Allen, P.E. & Miller, C.W. (2017). Novel host plant leads to the loss of sexual dimorphism in a sexually selected male weapon. *Proceedings of the Royal Society B: Biological Sciences*, 284, 20171269.
- Bisazza, A. & Pilastro, A. (1997). Small male mating advantage and reversed size dimorphism in poeciliid fishes. *Journal of Fish Biology*, 50, 397-406.
- Bradshaw, M.E. & Holzapfel, C.M. (1992). Resource limitation, habitat segregation, and species interactions of british tree-hole mosquitoes in nature. *Oecologia*, 90, 227-237.
- Colgoni, A. & Vamosi, S.M. (2006). Sexual dimorphism and allometry in two seed beetles (Coleoptera: Bruchidae). *Entomological Science*, 9, 171-179.
- Conner, J. & Via, S. (1992). Natural selection on body size in *Tribolium*: possible genetic constraints on adaptive evolution. *Heredity*, 69, 73-83.
- Constanz, G.D. (1975). Behavioral Ecology of Mating in the Male Gila Topminnow, *Poeciliopsis occidentalis* (Cyprinodontiformes: Poeciliidae). *Ecology*, 56, 966-973.
- de Boer, R.A., Eens, M. & Müller, W. (2016). A loss of heterozygosity, a loss in competition? The effects of inbreeding, pre- and postnatal conditions on nestling development. *Ecology and Evolution*, 6, 7921-7930.
- Deere, J.A., Coulson, T. & Smallegange, I.M. (2015). Life History Consequences of the Facultative Expression of a Dispersal Life Stage in the Phoretic Bulb Mite (*Rhizoglyphus robini*). *Plos One*, 10, e0136872.
- Dewsbury, D.A., Baumgardner, D.J., Evans, R.L. & Webster, D.G. (1980). Sexual Dimorphism for Body Mass in 13 Taxa of Muroid Rodents under Laboratory Conditions. *Journal of Mammalogy*, 61, 146-149.
- Dierks, A., Baumann, B. & Fischer, K. (2012). Response to selection on cold tolerance is constrained by inbreeding. *Evolution*, 66, 2384-2398.
- Drayton, J.M., Milner, R.N.C., Hall, M.D. & Jennions, M.D. (2011). Inbreeding and courtship calling in the cricket *Teleogryllus commodus*. *Journal of Evolutionary Biology*, 24, 47-58.
- Foelker, C.J. & Hofstetter, R.W. (2014). Heritability, Fecundity, and Sexual Size Dimorphism in Four Species of Bark Beetles (Coleoptera: Curculionidae: Scolytinae). *Annals of the Entomological Society of America*, 107, 143-151.
- Galicia, A., Cueva del Castillo, R. & Contreras-Garduño, J. (2014). Is Sexual Dimorphism in the Immune Response of *Grylodes sigillatus* Related to the Quality of Diet? *ISRN Evolutionary Biology*, 2014, 329736.
- Imasheva, A.G., Bosenko, D.V. & Bubli, O.A. (1999). Variation in morphological traits of *Drosophila melanogaster* (fruit fly) under nutritional stress. *Heredity*, 82, 187-192.
- Kellermann, V.M., Hoffmann, A.A. & SgrÒ, C.M. (2007). Hsp90 inhibition and the expression of phenotypic variability in the rainforest species *Drosophila birchii*. *Biological Journal of the Linnean Society*, 92, 457-465.
- Klein, A.L. & de Araújo, A.M. (2013). Sexual Size Dimorphism in the Color Pattern Elements of Two Mimetic *Heliconius* Butterflies. *Neotropical Entomology*, 42, 600-606.
- Kumano, N., Kuriwada, T., Shiromoto, K., Haraguchi, D. & Kohama, T. (2010). Effect of body size and sex ratio on male alternative mating tactics of the West Indian sweetpotato weevil, *Euscepes postfasciatus*. *Entomologia Experimentalis et Applicata*, 135, 154-161.
- Liefting, M., Hoffmann, A.A. & Ellers, J. (2009). Plasticity versus environmental canalization: population differences in thermal responses along a latitudinal gradient in *Drosophila serrata*. *Evolution*, 63, 1954-1963.
- Meuthen, D., Baldauf, S.A., Bakker, T.C.M. & Thünken, T. (2018). Neglected Patterns of Variation in Phenotypic Plasticity: Age- and Sex-Specific Antipredator Plasticity in a Cichlid Fish. *The American Naturalist*, 191, 475-490.
- Müller, T., Küll, C.L. & Müller, C. (2016). Effects of larval versus adult density conditions on reproduction and behavior of a leaf beetle. *Behavioral Ecology and Sociobiology*, 70, 2081-2091.
- Neethu, B. & Harini, B. (2014). Implications of macronutrient supplements causes stress on life history traits in immigrants species group of *Drosophila sulfurigaster sulfurigaster*.
- Nguyen, N.H., Khaw, H.L., Ponzoni, R.W., Hamzah, A. & Kamaruzzaman, N. (2007). Can sexual dimorphism and body shape be altered in Nile tilapia (*Oreochromis niloticus*) by genetic means? *Aquaculture*, 272, S38-S46.
- Nystrand, M., Dowling, D.K. & Simmons, L.W. (2011). Complex Genotype by Environment interactions and changing genetic architectures across thermal environments in the Australian field cricket, *Teleogryllus oceanicus*. *BMC Evolutionary Biology*, 11, 222.
- Otronen, M. (1988). The effect of body size on the outcome of fights in burying beetles (*Nicrophorus*). *Annales Zoologici Fennici*, 25, 191-201.
- Pillay, N. (2002). Inbreeding in Littledale's whistling rat *Parotomys littledalei*. *J Exp Zool*, 293, 171-178.

- Pitnick, S., Markow, T.A. & Spicer, G.S. (1995). Delayed male maturity is a cost of producing large sperm in *Drosophila*. *Proceedings of the National Academy of Sciences of the United States of America*, 92, 10614-10618.
- Prokop, Z.M., Le, J.E., Bana, P.K., Koteja, P. & Radwan, J. (2010). Low inbreeding depression in a sexual trait in the stalk-eyed fly *Teleopsis dalmanni*. *Evolutionary Ecology*, 24, 827-837.
- Radesäter, T. & Halldórsdóttir, H. (1993). Fluctuating asymmetry and forceps size in earwigs, *Forficula auricularia*. *Animal Behaviour*, 45, 626-628.
- Rantala, M.J., Viitaniemi, H. & Roff, D.A. (2011). Effects of inbreeding on potential and realized immune responses in *Tenebrio molitor*. *Parasitology*, 138, 906-912.
- Sánchez, E., Castillo, D. & Liria, J. (2017). Pupal shape and size dimorphism in *Aedes albopictus* (Skuse, 1894) (Diptera: Culicidae). *Journal of Threatened Taxa*, 6, 10314–10319.
- Schneider, J.M. (1997). Timing of maturation and the mating system of the spider, *Stegodyphus lineatus* (Eresidae): how important is body size? *Biological Journal of the Linnean Society*, 60, 517-525.
- Stillwell, R.C. & Fox, C.W. (2009). Geographic variation in body size, sexual size dimorphism and fitness components of a seed beetle: local adaptation versus phenotypic plasticity. *Oikos*, 118, 703-712.
- Stjernholm, F. & Karlsson, B. (2000). Nuptial gifts and the use of body resources for reproduction in the green-veined white butterfly *Pieris napi*. *Proceedings of the Royal Society of London. Series B: Biological Sciences*, 267, 807-811.
- Tast, J. (1972). Annual variations in the weights of wintering root voles, *Microtus oeconomus*, in relation to their food conditions. *Annales Zoologici Fennici*, 9, 116-119.
- Uusi-Heikkilä, S., Böckenhoff, L., Wolter, C. & Arlinghaus, R. (2012). Differential Allocation by Female Zebrafish (*Danio rerio*) to Different-Sized Males – An Example in a Fish Species Lacking Parental Care. *Plos One*, 7, e48317.
